# Supplementary material
Source: publisher figshare collection journal article supplement (https://acs.figshare.com/ndownloader/files/4145530)

## Supporting Information

### Stress relaxation via addition-fragmentation chain transfer in high $T_g$ , high conversion methacrylate-based systems

Hee Young Park, Christopher J. Kloxin, Ahmed S. Abuelyaman, Joe D. Oxman, and Christopher N. Bowman\*

#### *Infrared Spectra and the conversion measurement*

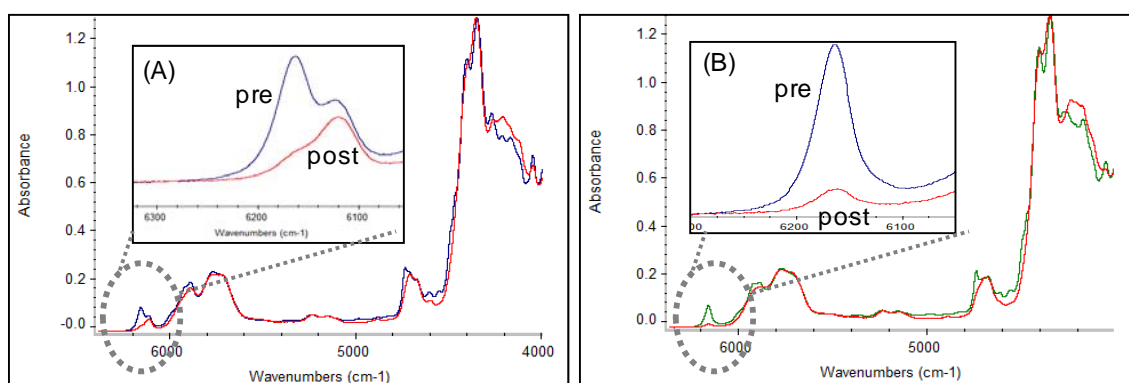

**Supplemental Figure 1. Infrared spectra pre- and post-polymerization of SAS (A) and SPS (B) used in these studies.** The disappearance of the peaks centered at 6164 and 6121 cm<sup>-1</sup> indicates the consumption of methacrylate (C=C-H stretch, overtone) and allyl sulfide (C=C-H stretch, overtone), respectively. As the methacrylate peak is overlapped with the allyl sulfide peaks in the spectrum of SAS, Gaussian fitting was used to deconvolute these peak areas as a function of time to determine the conversion.

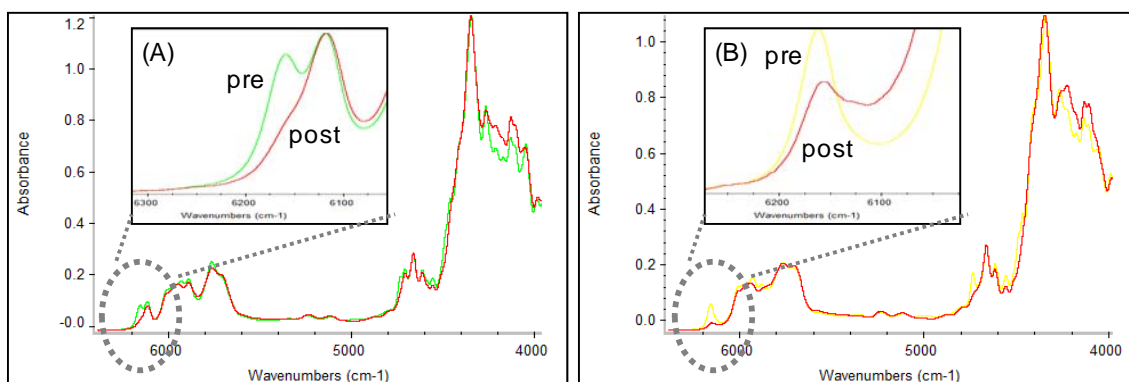

**Supplemental Figure 2. Infrared spectra pre- and post-polymerization of PAS (A) and PES (B) used in these studies.** The disappearance of the peaks centered at 6164 and 6121 cm<sup>-1</sup> indicates the consumption of methacrylate (C=C-H stretch, overtone) and allyl sulfide (C=C-H stretch, overtone), respectively. As the methacrylate peak is overlapped with the allyl sulfide peaks in the spectrum of PAS, Gaussian fitting was used to deconvolute these peak areas.

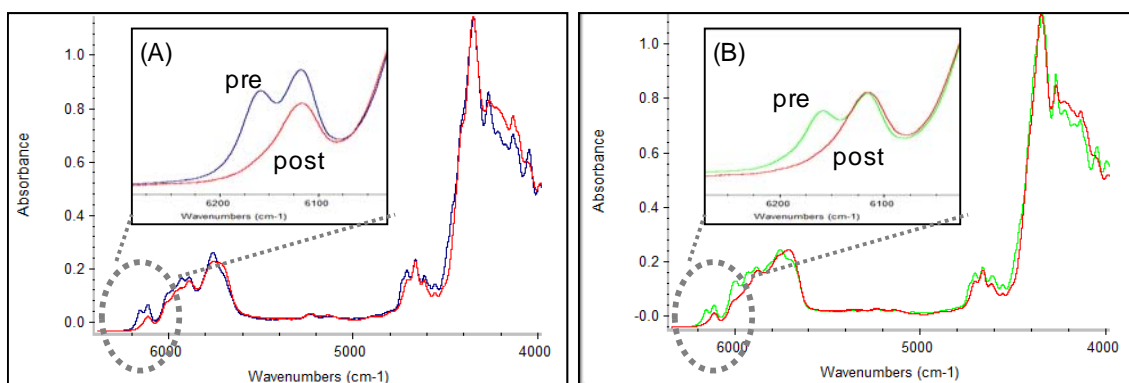

**Supplemental Figure 3. Infrared spectra pre- and post-polymerization of NAS-PETMP-PAS (A) and NPS-PETMP-PAS (B) used in these studies.** The disappearance of the peaks centered at 6164, 6121, 6111 cm<sup>-1</sup> indicate the consumption of methacrylate (C=C-H stretch, overtone), allyl sulfide (C=C-H stretch, overtone), and norbornene (C=C-H stretch, overtone), respectively. As the methacrylate peak is overlapped with the norbornene and allyl sulfide peaks in the spectrum of NAS-PETMP-PAS and NPS-PETMP-PAS, Gaussian fitting was used to deconvolute these peak areas.

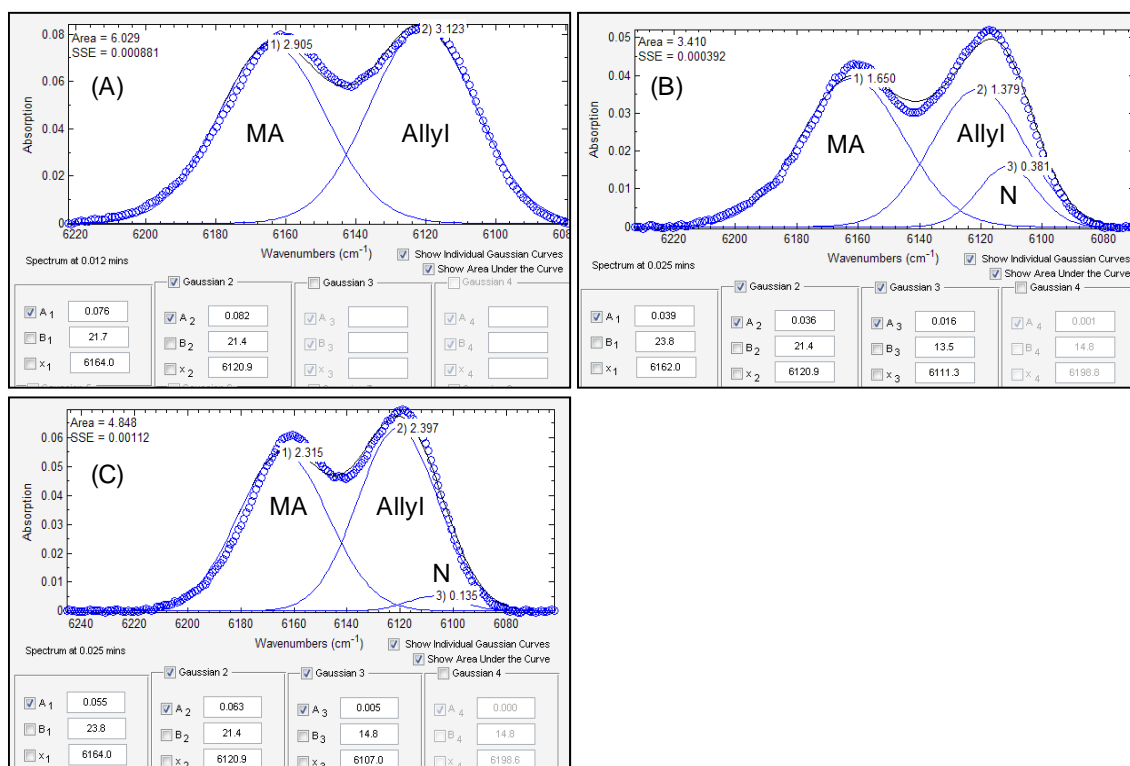

**Supplemental Figure 4. (A) Deconvoluted methacrylate and allyl peak areas of PAS using Gaussian fitting. Deconvoluted methacrylate, allyl, and norbornene peak areas of NPS-PETMP-PAS (B) and NAS-PETMP-PAS (C) using Gaussian fitting.**

***NMR spectroscopic characterization of the monomers synthesized herein***

1,9-bis[2-(methacryloyloxyethyl) succinyloxy]-3,7-dithia-5-methylene-nonane (SAS, Succinate Allyl Sulfide)

$^1\text{H}$  NMR (500 MHz,  $\text{CDCl}_3$ ,  $\delta$ ): 6.17(s,2H), 5.60(s,2H), 5.02(s,2H), 4.37(s,8H), 4.2(t,4H), 3.31(s,4H), 2.7-2.6(m,12H), 1.98(s,6H)

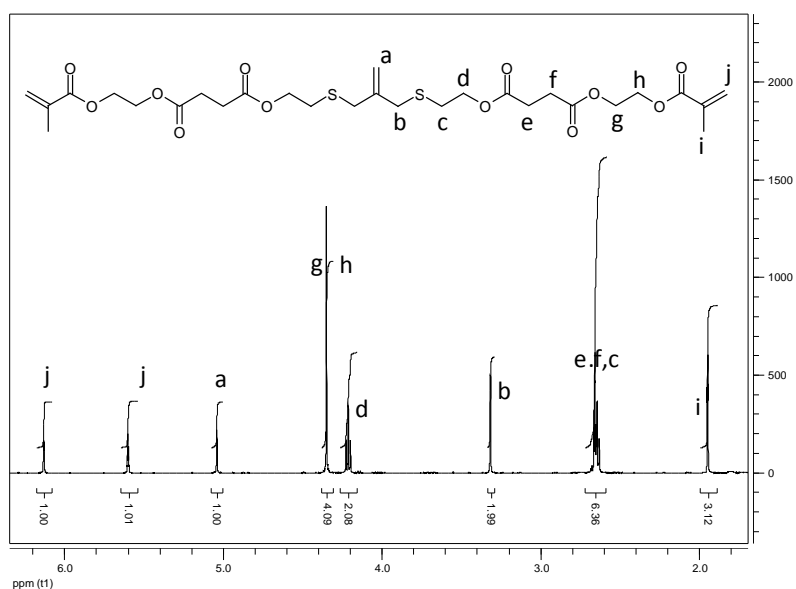

1,9-bis[2-(methacryloyloxyethyl) succinyloxy]-3,7-dithia-5-methyl-nonane (SPS, Succinate Propyl Sulfide)

$^1\text{H}$  NMR (500 MHz,  $\text{CDCl}_3$ ,  $\delta$ ): 6.17(s,2H), 5.60(s,2H), 4.37(s,8H), 4.2(t,4H), 2.75(m,6H), 2.7-2.6(m,8H), 2.5(m,2H), 1.98(s,6H), 1.90(m,1H), 1.10(d,3H)

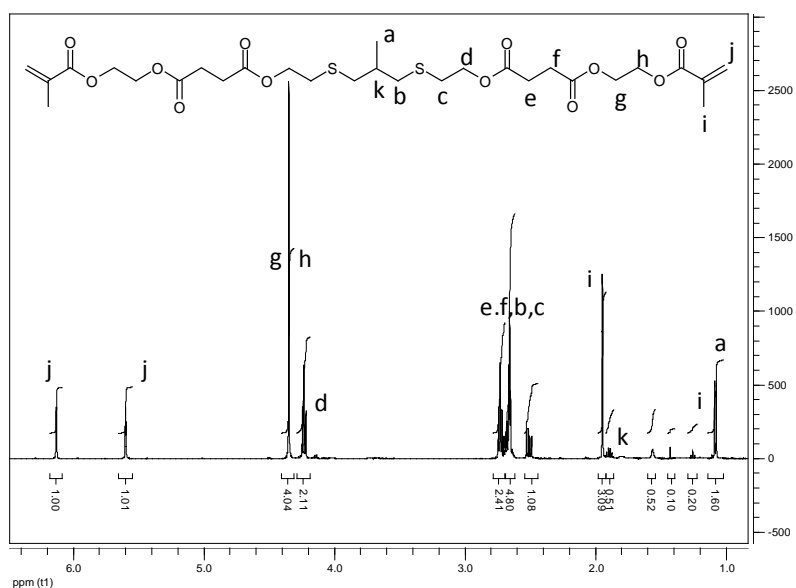

2-(methacryloyloxyethyl) 7-methylene-1,5-dithiocan-3-yl phthalate (PAS, Phthalate Allyl Sulfide)

$^1\text{H}$  NMR (500 MHz,  $\text{CDCl}_3$ ,  $\delta$ ): 7.78(d,2H), 7.6(d,2H), 6.2(s,1H), 5.61(s,1H), 5.32(m,1H), 5.28(s,2H), 4.6(t,2H), 4.45(t,2H), 3.3-3.1(m,8H), 1.98(s,3H), 1.58(s,4H)

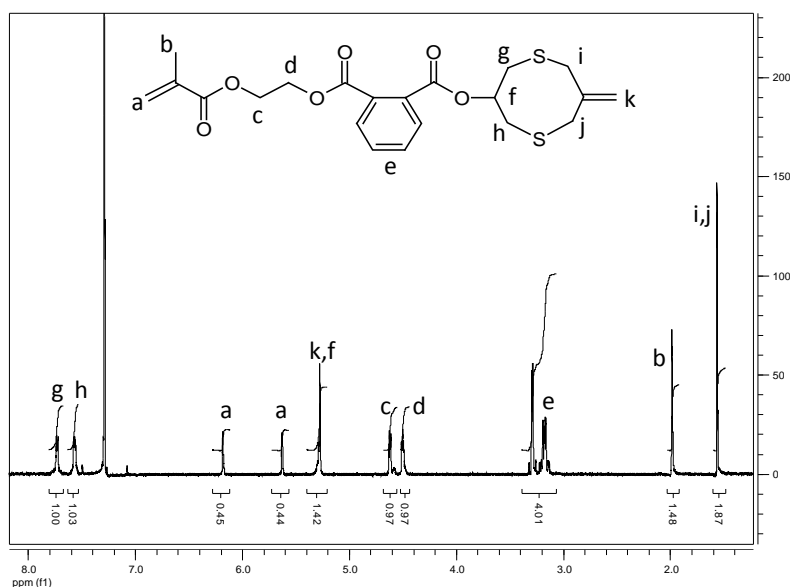

2-(methacryloyloxyethyl) 7-methyl-1,5-dithiocan-3-yl phthalate (PES, Phthalate Ethyl Sulfide)

$^1\text{H}$  NMR (500 MHz,  $\text{CDCl}_3$ ,  $\delta$ ): 7.78(d,2H), 7.6(d,2H), 6.2(s,1H), 5.61(s,1H), 5.32(m,1H), 4.6-4.45(m,4H), 3.3-3.1(m,4H), 2.8(t,4H), 2.3(m,2H), 1.98(s,3H)

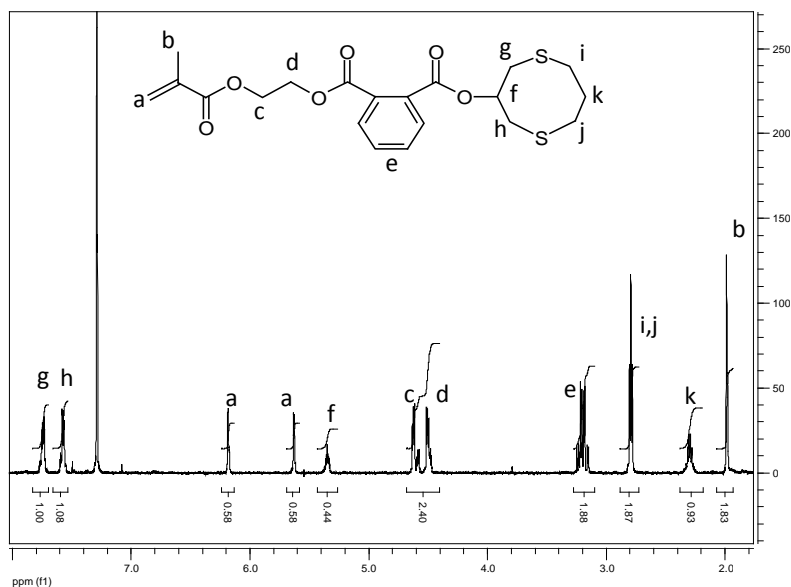

## 2-Methylene-propane-1,3-di(norbornene sulfide) (NAS)

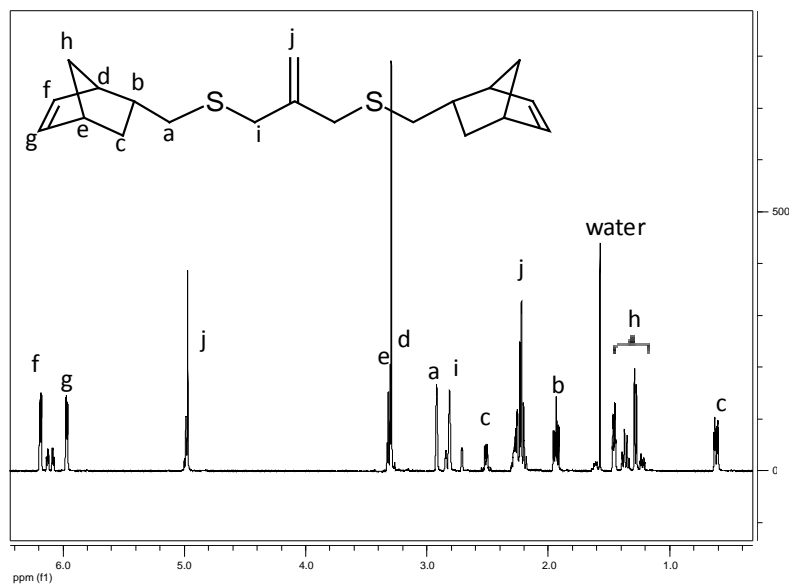

## 2-Methyl-propane-1,3-di(norbornene sulfide) (NPS)

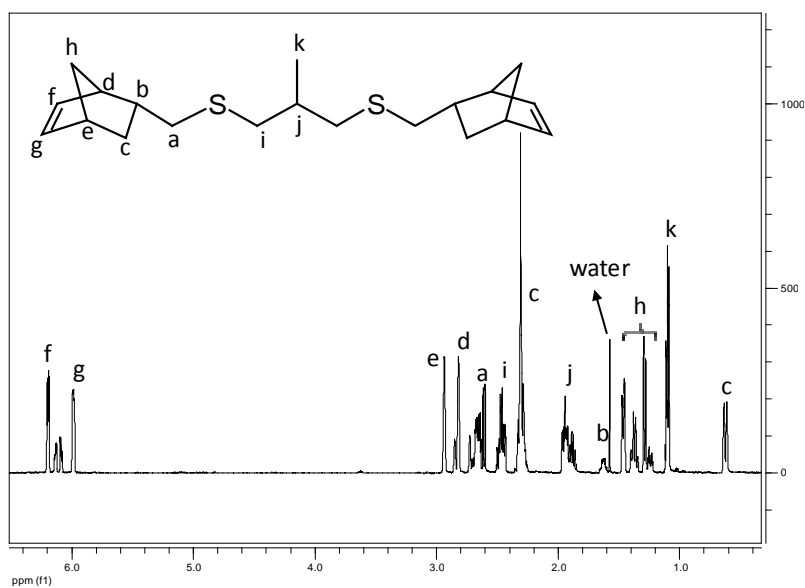

Supplement: Supplementary file 1 [file 4145530]
